# Supplementary material for: Linagliptin Lowers Albuminuria on Top of Recommended Standard Treatment in Patients With Type 2 Diabetes and Renal Dysfunction
Source: PubMed Central journal article supplement — Diabetes Care. 2013 Oct 15;36(11):3460–8. doi: 10.2337/dc13-0323 (PMC3816860; doi:10.2337/dc13-0323), 2013-10-15
Supplement: supp_dc13-0323v130323_DC130323SupplementaryData.pdf [file supp_dc13-0323v130323_DC130323SupplementaryData.pdf]

SUPPLEMENTARY DATA

**Supplementary Table 1.** 24-week clinical trials included in the pooled analysis in which subjects received either placebo or 5 mg/day linagliptin as monotherapy or in combination with other oral glucose-lowering agents either placebo or 5 mg/day linagliptin as monotherapy or in combination with other oral glucose-lowering agents.

| ClinicalTrials.gov<br>Registration<br>Number | Background<br>treatment     | Treatment<br>groups     | Pooled analysis set* |                 | Reference                  |
|----------------------------------------------|-----------------------------|-------------------------|----------------------|-----------------|----------------------------|
|                                              |                             |                         | Linagliptin<br>n=162 | Placebo<br>n=55 |                            |
| NCT00621140                                  | None                        | Linagliptin;<br>placebo | 16 (9.9%)            | 10<br>(18.2%)   | Del Prato,<br>2011         |
| NCT00798161                                  | None                        | Linagliptin;<br>placebo | 10 (6.2%)            | 4 (7.3%)        | Haak,<br>2012 <sup>†</sup> |
| NCT00601250                                  | Metformin                   | Linagliptin;<br>placebo | 47 (29.0%)           | 14<br>(25.5%)   | Taskinen,<br>2011          |
| NCT00602472                                  | Metformin +<br>sulfonylurea | Linagliptin;<br>placebo | 89 (54.9%)           | 27<br>(49.1%)   | Owens,<br>2011             |

\*Pooled analysis set includes randomized patients who received at least one dose of treatment, *had a baseline* UACR between 30–3000 mg/g Cr, a *baseline* eGFR  $\geq 30$  mL/min per 1.73m<sup>2</sup>, and had been receiving stable doses of ACEIs, ARBs, or both for at least 4 weeks prior to study conduct and from baseline to date of last UACR on-treatment measurement within the 24 week treatment period. <sup>†</sup>Data from other treatment groups (i.e., metformin 500 mg, linagliptin 2.5 mg + metformin 500 mg, metformin 1000 mg, and linagliptin 2.5 mg + metformin 1000 mg) were not included in the pooled analysis reported here.

SUPPLEMENTARY DATA

**Supplementary Table 2.** Summary of clinical adverse events.

|                                                                          | <b>Linagliptin<br/>(n=162)</b> | <b>Placebo<br/>(n=55)</b> |
|--------------------------------------------------------------------------|--------------------------------|---------------------------|
| Any AE                                                                   | 61.1                           | 63.6                      |
| Drug-related AEs                                                         | 13.0                           | 5.5                       |
| AEs leading to discontinuation                                           | 0.6                            | 1.8                       |
| Serious AEs                                                              | 2.5                            | 5.5                       |
| Deaths                                                                   | 0.0                            | 0.0                       |
| <i>Most common AEs (&gt;5% in any treatment group) by preferred term</i> |                                |                           |
| Hyperglycemia                                                            | 8.0                            | 21.8                      |
| Hypoglycemia                                                             | 14.2                           | 0.0                       |
| Upper respiratory tract infection                                        | 1.9                            | 9.1                       |
| Back pain                                                                | 1.2                            | 5.5                       |
| Nasopharyngitis                                                          | 6.2                            | 5.5                       |
| Headache                                                                 | 5.6                            | 3.6                       |
| Hypertension                                                             | 2.5                            | 5.5                       |
| Dizziness                                                                | 3.7                            | 5.5                       |
| <i>AEs of special interest by system organ class</i>                     |                                |                           |
| Gastrointestinal disorders                                               | 12.3                           | 23.6                      |
| Renal and urinary disorders                                              | 4.3                            | 5.5                       |
| Skin/subcutaneous tissue disorders                                       | 1.9                            | 3.6                       |

Data are expressed as percentages. Investigator-reported hypoglycemia was observed in 14.8% in the linagliptin group versus 0.0% in the placebo group. All subjects who experienced investigator-reported hypoglycemia in the linagliptin group were on sulfonylurea background therapy. No investigator-reported hypoglycemic events were reported in patients treated with linagliptin as monotherapy or add-on to metformin.

SUPPLEMENTARY DATA

**Supplementary Figure 1.** Schematic diagram of clinical trial design used in all four studies included in the pooled analysis.

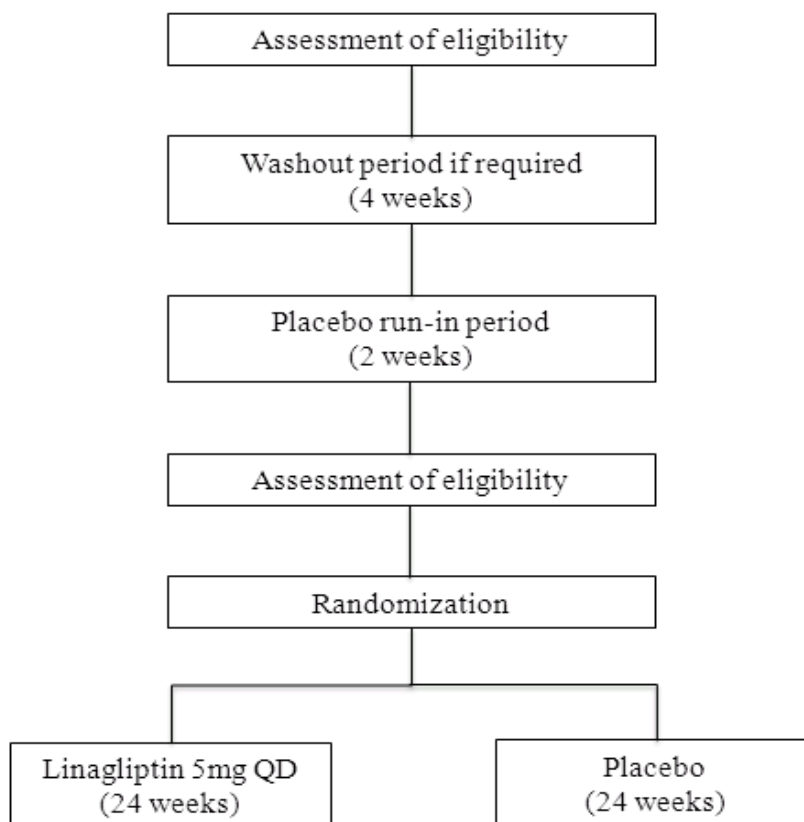

SUPPLEMENTARY DATA

**Supplementary Figure 2.** Adjusted geometric mean of percentage change in UACR from baseline to week 24 in the linagliptin group stratified by clinical trials\*.

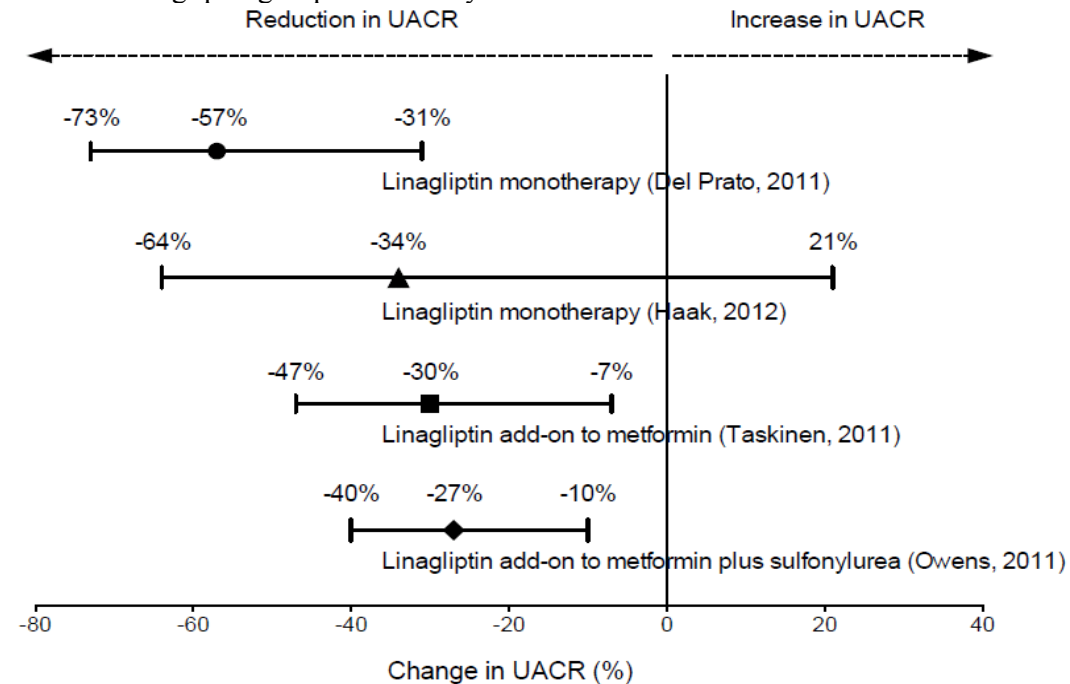

\*. Black circle, linagliptin (Del Prato, 2011):  $n = 16$ ; black triangle, linagliptin (Haak, 2012):  $n = 10$ ; black square, linagliptin add-on to metformin (Taskinen, 2011):  $n = 47$ ; black diamond, linagliptin add-on to metformin plus sulfonylurea (Owens, 2011):  $n = 89$ . Error bars represent 95% CIs. \*Adjusted geometric mean of percentage change in UACR from baseline to week 24 in the placebo group stratified by clinical trials were respectively +26% ([95% CI: -31, +132],  $n = 10$ ) with placebo (Del Prato, 2011), +168% ([95% CI: +2, +601],  $n = 4$ ) with placebo (Haak, 2012), -14% ([95% CI: -49, +43],  $n = 14$ ) with placebo add-on to metformin (Taskinen, 2011) and -25% ([95% CI: -48, +9],  $n = 27$ ) with placebo add-on to metformin plus sulfonylurea (Owens, 2011). The treatment x study interaction was significant ( $P = 0.0277$ ). This interaction might be attributable to high between-study variance of the placebo UACR response, ranging from -25% to +168%, probably due to small sample sizes (ranging from 4 to 27). In contrast, the linagliptin UACR response showed consistent reductions across the trials, ranging from -27% to -57% alongside larger sample sizes (ranging from 10 to 89).
